# Supplementary material for: Quantum Defects as a Toolbox for the Covalent Functionalization of Carbon Nanotubes with Peptides and Proteins
Source: PubMed Central journal article supplement (PMC7540668; doi:10.1002/anie.202003825), 2020-07-13

Supporting Information

**Quantum Defects as a Toolbox for the Covalent Functionalization of Carbon Nanotubes with Peptides and Proteins**

*Florian A. Mann, Niklas Herrmann, Felipe Opazo, and Sebastian Kruss\**

anie\_202003825\_sm\_miscellaneous\_information.pdf

Table of contents

|          |                                                                                                                  |    |
|----------|------------------------------------------------------------------------------------------------------------------|----|
| 1.       | Experimental Procedures.....                                                                                     | 2  |
| 1.1.     | General Information .....                                                                                        | 2  |
| 1.2.     | Chemical synthesis.....                                                                                          | 3  |
| 1.2.1.   | 4-( <i>N</i> -maleimido)phenyldiazonium tetrafluoroborate (2).....                                               | 3  |
|          | Fmoc-L-4-diazonium-phenylalanine tetrafluoroborate (6).....                                                      | 3  |
| 1.3.     | Carbon nanotube reactions.....                                                                                   | 4  |
| 1.3.1.   | Synthesis of SWCNT*-Ph-Mal (3) .....                                                                             | 4  |
| 1.3.2.   | Synthesis of SWCNT*-Ph-GBP (5).....                                                                              | 4  |
| 1.3.2.1. | Sequential reaction .....                                                                                        | 4  |
| 1.3.2.2. | One-step reaction.....                                                                                           | 4  |
| 1.3.3.   | Synthesis of SWCNT*-Phe-Fmoc (7) .....                                                                           | 4  |
| 1.3.4.   | Synthesis of SWCNT*-Phe-5(6)-CF (10).....                                                                        | 5  |
| 1.3.3    | Synthesis of SWCNT*-Phe-R <sub>6</sub> -CF (11) .....                                                            | 5  |
| 1.3.4    | 96-well synthesis of SWCNT*-Peptides.....                                                                        | 5  |
| 1.4      | <i>In vitro</i> GFP-binding assay .....                                                                          | 6  |
| 1.5      | VIS/NIR fluorescence microscopy of SWCNT*-F-CF, SWCNT*-F-R <sub>6</sub> -CF and the corresponding controls ..... | 6  |
| 1.6      | VIS-fluorescence spectroscopy of SWCNT*-F-CF .....                                                               | 6  |
| 2.       | Results and Discussion.....                                                                                      | 7  |
| 3.       | References .....                                                                                                 | 14 |
| 4.       | Author Contributions.....                                                                                        | 14 |
| 5.       | NMR spectra of diazonium salts 2 and 6 .....                                                                     | 15 |
| 5.1.     | 4-( <i>N</i> -maleimido)phenyldiazonium tetrafluoroborate (2) .....                                              | 15 |
| 5.2.     | Fmoc-L-4-diazonium-phenylalanine tetrafluoroborate (6) .....                                                     | 19 |

## SUPPORTING INFORMATION

## 1. Experimental Procedures

### 1.1. General Information

**NMR** spectra were recorded with a Bruker™ Avance III HD 300 device (Bruker Corp., USA), equipped with a 5 mm probe. For a measurement, approx. 15 mg of substance were dissolved in approx. 600  $\mu\text{L}$  of the deuterated solvent stated and transferred to a standard glass NMR tube ( $d = 5 \text{ mm}$ ). The chemical shifts are reported in ppm relative to the residual solvent peak(s). Analysis was performed within MestReNova™ 10.

**ESI-TOF-MS** measurements of diazonium salts were performed on a Bruker™ micrOTOF ESI-TOF-MS using the non-deuterated form of the solvent also used for NMR measurements.

**VIS-fluorescence** spectra were acquired between 500 and 600 nm using an excitation wavelength of 490 nm on a FluoroMax-4 spectrofluorometer (Horiba Scientific, Japan).

**Reagents and solvents** were, unless stated otherwise, of synthesis grade quality and used without further purification. Fmoc-protected amino acids were purchased either from IRIS Biotech (Germany) or Novabiochem (Germany).

**(6,5)-chirality enriched single-walled carbon nanotubes** (SWCNTs, Product No.: 773735) were acquired from Sigma Aldrich (Darmstadt, Germany).

**SWCNT/SDBS stock solutions** were generated by tip sonication of a SWCNT/SDBS (1%) suspension for 15 minutes (Fisher Scientific™ Model 120 Sonic Dismembrator, 30% amplitude, 36 W) followed by centrifugation (2x, 16100g). Only the supernatant (top 80%) was used for further studies.

**Experiments and measurements** were, unless otherwise stated, performed in phosphate buffered saline (PBS, 8.2 mM  $\text{Na}_2\text{HPO}_4$ , 1.8 mM  $\text{K}_2\text{HPO}_4$ , 137 mM NaCl, 2.7 mM KCl, pH 7.4).

**Protein concentrations** were determined *via* absorbance measurements at 280 nm with a NanoDrop 2000™ spectrophotometer (ThermoFisher Scientific Inc., USA) using the extinction coefficient of the respective protein at 280 nm. The mean value of at least three independent measurements was taken for concentration calculation.

**VIS/NIR absorbance spectroscopy** was conducted on a JASCO V-670 (Spectra Manager Software) using a 10 mm-path cuvette. Spectra were acquired using a scan speed of  $1000 \text{ nm}\cdot\text{min}^{-1}$ , a data interval of 0.5 nm and a UV/vis and NIR bandwidth of 2 nm and 4 nm, respectively.

SWCNT concentration was estimated using the maximal absorbance at approx. 990 nm using the molar extinction coefficient determined by Schöppler *et al.*<sup>[1]</sup>

**NIR fluorescence spectroscopy** was conducted in glass-bottom 96-well plates *via* excitation at 561 nm using a gem-561 laser (LaserQuantum™, Germany) at 100 mW excitation power and fluorescence spectra were recorded in the range between 850 and 1250 nm using a Shamrock 193i spectrograph (Andor Technology Ltd., Belfast, Northern Ireland) coupled to an Olympus IX73 microscope and an exposure time of 1 s, a slit width of 500  $\mu\text{m}$  and an Andor iDus InGaAs 491 array NIR detector

**2D-excitation-emission maps** were recorded in glass-bottom 96-well plates *via* excitation between 400 and 800 nm using a 300 W Xe-lamp guided through a monochromator (LOT, Germany) and detection between 850 and 1250 nm using a Shamrock 193i spectrograph (Andor Technology Ltd., Belfast, Northern Ireland) coupled to an Olympus IX73 microscope and an exposure time of 5 s, a slit width of 500  $\mu\text{m}$  and an Andor iDus InGaAs 491 array NIR detector.

**Atomic Force Microscopy (AFM)** was conducted in intermittent-contact mode (scan rate = 0.5 Hz, 512 lines) using an Asylum Research MFP-3D Infinity® instrument equipped with rectangular cantilevers (Opus, MikroMasch Europe, Al-coating, tetrahedral tip,  $\nu_{\text{res}} = 300 \text{ kHz}$ ,  $k = 26 \text{ N}\cdot\text{m}^{-1}$ ). Freshly cleaved muscovite mica was incubated with a poly-L-lysine (PLL,  $0.1 \text{ mg}\cdot\text{mL}^{-1}$ , 10 min) solution. After washing with MilliQ water, the coated mica was incubated with 10  $\mu\text{L}$  of the sample solution for another 10 minutes followed by repeated washing of the surface with MilliQ water and drying using a  $\text{N}_2$ -stream before sample measurement. Analysis of the acquired images was performed *via* the open-source software Gwyddion.

**VIS-NIR-fluorescence microscopy** was carried out under 561 nm-laser excitation (Cobolt Jive laser, Cobolt AB, Solna, Sweden,  $P_{\text{max.}} = 500 \text{ mW}$ ) on an Olympus IX53 microscope equipped with a 100x oil-immersion objective (Olympus 100x UPLSAPO 100XS, NA = 1.35). Detection of the near-infrared photoluminescence was carried using a Xenics Cheetah-640-TE3 NIR camera (Xenics,

## SUPPORTING INFORMATION

Heverlee, Belgium), while the VIS-fluorescence was detected with an Andor Zyla 5.5 sCMOS camera (Andor Technology Ltd., Belfast, Northern Ireland).

## 1.2. Chemical synthesis

1.2.1. 4-(*N*-maleimido)phenyldiazonium tetrafluoroborate (2)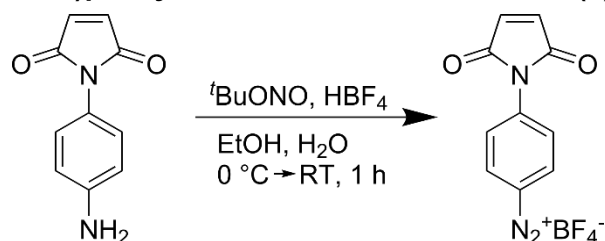

4-(*N*-Maleimido)phenyldiazonium tetrafluoroborate was synthesized using an optimized procedure based on the general procedure given in [2]. In a glass snap-cap vial, 4-(*N*-aminophenyl)maleimide (95.1 mg, 505  $\mu\text{mol}$ , 1.0 eq.) was dissolved in ethanol (500  $\mu\text{L}$ ). Tetrafluoroboric acid (50% aqueous solution, 125  $\mu\text{L}$ , 175 mg, 996  $\mu\text{mol}$ , 2.0 eq.) was added and the resulting red suspension was cooled to 0  $^{\circ}\text{C}$  in an ice/water bath. Under magnetic stirring, *tert*-butyl nitrite (135  $\mu\text{L}$ , 117 mg, 1.13 mmol, 2.2 eq.) was added dropwise *via* syringe. The resulting greyish suspension was stirred for 1 h at room temperature. Diethyl ether (1 mL) was added and the resulting grey suspension was transferred to a polypropylene vial and centrifuged (2 min at 16100 g). The yellow supernatant was decanted off and the remaining solid was suspended in diethyl ether (1 mL). The centrifugation-decantation-suspension washing cycle was repeated three times before the resulting solid was dried under reduced pressure at room temperature to yield a slightly yellow solid.

While standard precautions were taken during synthesis and handling of the herein presented diazonium salts, no decomposition was observed even over several weeks.

$^1\text{H-NMR}$  (300 MHz,  $\text{CD}_3\text{CN}$ ):  $\delta$  (ppm) = 8.54-8.60 (m, 2H,  $\text{H}_{2,6}$ ), 8.09-8.15 (m, 2H,  $\text{H}_{3,5}$ ), 7.08 (s, 2H,  $\text{H}_{\text{maleimide}}$ ).

$^{11}\text{B-NMR}$  (96 MHz,  $\text{CD}_3\text{CN}$ ):  $\delta$  (ppm) = -1.16 (s).

$^{19}\text{F-NMR}$  (282 MHz,  $\text{CD}_3\text{CN}$ ):  $\delta$  (ppm) = -151.48 (s), -151.54 (s) (two signals due to the two NMR-active boron isotopomers).

$^{13}\text{C-NMR}$  (75 MHz,  $\text{CD}_3\text{CN}$ ):  $\delta$  (ppm) = 169.4, 144.8, 136.5, 134.7, 127.4, 111.2.

The NMR data is in good agreement with literature data. [3]

**HRMS (ESI (pos.))** [ $m/z$ ]: calculated ( $\text{C}_{10}\text{H}_6\text{N}_3\text{O}_2$  [ $\text{M}^+$ ]): 200.0455, found: 200.0448; calculated ( $\text{C}_{10}\text{H}_6\text{NO}_2$  [ $\text{M-N}_2^+$ ]): 172.0393, found: 172.0389; ( $\text{C}_{11}\text{H}_{10}\text{NO}_3$  [ $\text{M-N}_2+\text{MeOH}^+$ ]): 204.0645, found: 204.0655.

## Fmoc-L-4-diazonium-phenylalanine tetrafluoroborate (6)

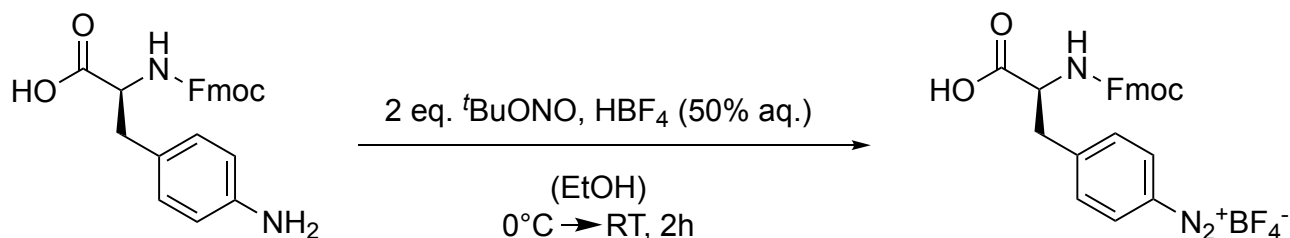

Fmoc-L-4-diazonium-phenylalanine tetrafluoroborate was synthesized using an optimized procedure based on the general procedure given in [2]. Fmoc-L-4-aminophenylalanine (0.2 g, 0.497 mmol) was dissolved in 500  $\mu\text{L}$  ethanol in a 5 mL glass scintillation vial. Next, approx. 125  $\mu\text{L}$   $\text{HBF}_4$  (50% aqueous, ) were added dropwise. The solution was placed in an ice bath and stirred constantly while 135  $\mu\text{L}$   $^t\text{Bu-ONO}$  (2 eq., 1.1 mmol, 117 mg) were added dropwise over the course of 30 min. Next, the solution was stirred for two hours at rt. After the reaction was completed, a white/slightly yellow precipitate was observed and transferred to a 2 mL Eppendorf tube using 1 mL diethyl ether. The precipitate was centrifuged at 16100g for five minutes and the supernatant discarded. This process was repeated five times and the crude product was dried under reduced pressure at room temperature.

## SUPPORTING INFORMATION

While standard precautions were taken during synthesis and handling of the herein presented diazonium salts, no decomposition was observed even over several weeks.

**<sup>1</sup>H-NMR** (300 MHz, CD<sub>3</sub>CN):  $\delta$  (ppm) = 8.35 (d,  $J$  = 8.5 Hz, 2H), 7.84 (d,  $J$  = 7.5 Hz, 2H), 7.76 (d,  $J$  = 8.4 Hz, 2H), 7.61 (dd,  $J$  = 7.5, 4.6 Hz, 2H), 7.43 (t,  $J$  = 7.5 Hz, 2H), 7.35 (t,  $J$  = 7.5 Hz, 2H), 6.13 (d,  $J$  = 8.7 Hz, 1H), 4.53 (s, 1H), 4.30 (d,  $J$  = 6.2 Hz, 2H), 4.18 (t,  $J$  = 6.8 Hz, 1H), 3.50 – 3.41 (m, 1H), 3.27 – 3.16 (m, 1H).

**<sup>11</sup>B-NMR** (96 MHz, CD<sub>3</sub>CN):  $\delta$  (ppm) = -1.15 (s).

**<sup>19</sup>F-NMR** (282 MHz, CD<sub>3</sub>CN):  $\delta$  (ppm) = -151.47 (s), -151.53 (s) (two signals due to the two NMR-active boron isotopomers).

**HRMS (ESI (pos.))** [ $m/z$ ]: calculated (C<sub>24</sub>H<sub>21</sub>NO<sub>4</sub> [M-N<sub>2</sub>]<sup>+</sup>): 386.1392, found: 386.1387.

### 1.3. Carbon nanotube reactions

#### 1.3.1. Synthesis of SWCNT\*-Ph-Mal (3)

A (6,5)-chirality enriched SWCNT solution (**1**, 180  $\mu$ L of a 10 nmol L<sup>-1</sup> solution in 1% SDBS) was mixed with an aqueous solution of 4-(*N*-maleimido)phenyldiazonium tetrafluoroborate (**2**, 20  $\mu$ L, 1 mmol L<sup>-1</sup>) and irradiated in a 96-well plate using a Lumidox™ (Analytical Sales & Services, Inc., Flanders, NJ, USA) 96 green LED array with an LED current of 25 mA. After reaction control using nIR fluorescence spectroscopy, the reaction mixtures were transferred to spin filters (Vivaspin™ 500, MWCO = 100 kDa,  $v$  = 500  $\mu$ L, Sartorius, Göttingen, Germany) and centrifuged (12000 g, RT, final volume = approx. 50  $\mu$ L). The SWCNT\* precipitated on the filter's membrane were washed with water (5  $\times$  450  $\mu$ L), each time followed by a centrifugation step, and finally resuspended in a solution of the chosen surfactant (either 1% SDBS or 2 mg/mL 1,2-distearoyl-*sn*-glycero-3-phosphoethanolamine-*N*-[methoxy(polyethylene glycol)-5000] (ammonium salt) [PL-PEG5000]) by scraping off the filter and repeated pipetting. For redispersion, those suspensions were tip-sonicated (30% amplitude, 36 W, 5 min, 0 °C), centrifuged (16100g, 30 min) and the supernatant used for further studies.

#### 1.3.2. Synthesis of SWCNT\*-Ph-GBP (5)

##### 1.3.2.1. Sequential reaction

A (6,5)-chirality enriched SWCNT solution (**1**, 180  $\mu$ L of a 10 nmol L<sup>-1</sup> solution in 1% SDBS) was mixed with an aqueous solution of 4-(*N*-maleimido)phenyldiazonium tetrafluoroborate (**2**, 20  $\mu$ L, 1 mmol L<sup>-1</sup>) and 6.4  $\mu$ L of a 156  $\mu$ M GBP-Nanobody (**4**, previously reduced on ice using TCEP [5 mM] for 30 minutes) solution in a 96-well plate. The mixed solution was irradiated using a Lumidox™ (Analytical Sales & Services, Inc., Flanders, NJ, USA) 96 green LED array with an LED current of 25 mA for 15 minutes followed by removal of the excess MalPh-Dz **2** using spin-filtration (300 kDa MWCO) and subsequent resuspension of the MalPh-SWCNT\* **3** in 1x phosphate-buffered saline (PBS, pH 7.4). 500 eq. (~25 eq. with respect to introduced maleimides) of the nanobody **4** were added and the solution left shaking gently for 16 hours at room temperature. To remove excess unreacted nanobody, 300 kDa-MWCO spin filtration was carried out (5x washing with 1x PBS) followed by redispersion using PL-PEG5000 (2 mg·mL<sup>-1</sup>).

##### 1.3.2.2. One-step reaction

A (6,5)-chirality enriched SWCNT solution (**1**, 180  $\mu$ L of a 10 nmol L<sup>-1</sup> solution in 1% SDBS) was mixed with an aqueous solution of 4-(*N*-maleimido)phenyldiazonium tetrafluoroborate (**2**, 20  $\mu$ L, 1 mmol L<sup>-1</sup>) and 6.4  $\mu$ L of a 156  $\mu$ M GBP-Nanobody (**4**, previously reduced on ice using TCEP [5 mM] for 30 minutes) solution in a 96-well plate. The mixed solution was irradiated using a Lumidox™ (Analytical Sales & Services, Inc., Flanders, NJ, USA) 96 green LED array with an LED current of 25 mA for 30 minutes and subsequently transferred to a microcentrifuge tube and left shaking gently for 15 hours at room temperature. To remove excess unreacted nanobody, 300 kDa-MWCO spin filtration was carried out (5x washing with 1x PBS) followed by redispersion using PL-PEG5000 (2 mg·mL<sup>-1</sup>).

#### 1.3.3. Synthesis of SWCNT\*-Phe-Fmoc (7)

To generate a SWCNT-SDBS dispersion (1% SDBS), 500  $\mu$ L of an aqueous 2% SDBS solution were added to 500  $\mu$ L of a 2 mg/mL SWCNT/water suspension. This solution was tip-sonicated for 15 minutes (Fisher Scientific™ Model 120 Sonic Dismembrator, 30% amplitude, 36 W) followed by centrifugation (2x, 16100g) and only the supernatant (top 80%) used for

## SUPPORTING INFORMATION

further studies. In the next step, the supernatant was diluted using 1%SDBS to yield a 10 nM solution (**1**, see SWCNT concentration determination, section 1.1). In a 96well-plate, 180  $\mu\text{L}$  of this solution were added to 15 wells followed by the addition of different concentrations of Fmoc-Phe- $\text{N}_2^+\text{BF}_4^-$  (**6**, 0 nM-100  $\mu\text{M}$ ). After careful mixing via repeating pipetting, the solutions were irradiated using a green 96-LED-array irradiator (Lumidox<sup>TM</sup>, Analytical Sales & Services, Inc., Flanders, NJ, USA) at 25 mA for 15 minutes to yield solutions of **7**. The solutions were analyzed by nIR fluorescence spectroscopy for the degree of defect-introduction. The excess diazonium salt **6** was removed via repeated 300kDa-cut-off spin filtration (5x 600  $\mu\text{L}$  ddH<sub>2</sub>O washing) and the remaining SWCNT\* were resuspended in 500  $\mu\text{L}$  ddH<sub>2</sub>O. In the last step, supernatant and pellet were then separated by centrifugation (16100g, 15 minutes) and the pellet containing SWCNT\*-Phe-Fmoc **7** was used for downstream experiments.

### 1.3.4. Synthesis of SWCNT\*-Phe-5(6)-CF (10)

The solutions of three wells from the Fmoc-Phe defect introduction process ( $v = 600 \mu\text{L}$ , approx. 5.4 pmol SWCNT\*-Phe-Fmoc **7**) were added to a frit (20  $\mu\text{m}$  pore size)-equipped syringe reactor ( $v = 2 \text{ mL}$ ), mixed with 1 mL EtOH for SWCNT precipitation and subsequent washing and removal of residual SDBS surfactant and excess Fmoc-Phe-Dz (5x 1 mL dH<sub>2</sub>O, 3x DMF, 3x DCM, 3x DMF). Deprotection of the Fmoc-group was achieved via incubation with 200  $\mu\text{L}$  of 20% piperidine/dimethylformamide (DMF, 2x 15 min). Excess reagents were removed by repeated washing with DMF/dichloromethane (DCM)/DMF (3x 1 mL). Subsequent amide coupling to 5(6)-carboxyfluorescein (CF) was carried out in the dark for 30 minutes at room temperature after the addition of 1.88 mg 5(6)-CF (5  $\mu\text{mol}$ ), 1.9 mg HATU (5  $\mu\text{mol}$ ) and 1.74  $\mu\text{L}$  N,N-Diisopropylethylamine (DIPEA, 10  $\mu\text{mol}$ ) in 50  $\mu\text{L}$  DMF. Excess reagents were removed by repeated washing with DMF/DCM/DMF (3x 1 mL). The crude product **10** was scraped off the frit using 50  $\mu\text{L}$  DMF, transferred to a 1.5 mL microcentrifuge tube and centrifuged at 16100 g (15 min). The pellet was resuspended in 100  $\mu\text{L}$  of a 1% SDBS solution and ultrasonicated (3 min, RT, 30% amplitude) followed by centrifugation (15 min, 16100g) and separation of pellet and supernatant. The latter was used for fluorescence microscopy and spectroscopy applications.

### 1.3.3 Synthesis of SWCNT\*-Phe-R<sub>6</sub>-CF (11)

The solutions of 20 wells from the Fmoc-Phe defect introduction process ( $v = 4 \text{ mL}$ , approx. 36 pmol SWCNT\*-Phe-Fmoc **7**) were pooled, mixed with 6 mL EtOH for SWCNT precipitation in a glass vial and the suspension subsequently transferred to a frit (20  $\mu\text{m}$  pore size)-equipped syringe reactor ( $v = 2 \text{ mL}$ ). Residual SDBS surfactant and excess Fmoc-Phe-Dz were removed via washing (5x 1 mL dH<sub>2</sub>O, 3x DMF, 3x DCM, 3x DMF). Deprotection of the Fmoc-group was achieved via incubation with 200  $\mu\text{L}$  of 20% piperidine/DMF (2x 15 min). Fmoc-based solid-phase peptide synthesis (SPPS) couplings to Fmoc-Arg(Pbf)-OH (11.7 mg, 18  $\mu\text{mol}$ ) and 5(6)-CF (6.8 mg, 18  $\mu\text{mol}$ ) were carried out for 30 minutes at room temperature with 6.8 mg 1-[Bis(dimethylamino)methylene]-1H-1,2,3-triazolo[4,5-b]pyridinium 3-oxide hexafluorophosphate (HATU, 18  $\mu\text{mol}$ ) and 6.3  $\mu\text{L}$  DIPEA (36  $\mu\text{mol}$ ) in 100  $\mu\text{L}$  DMF. Excess reagents were removed by repeated washing with DMF/DCM/DMF (3x 1 mL). After 5(6)-CF coupling and washing, the side-chain protecting groups ((2,2,4,6,7-pentamethyldihydrobenzofuran-5-sulfonyl), Pbf) were cleaved upon gentle shaking with the cleavage cocktail (75% TFA/20% DCM/2.5% H<sub>2</sub>O/2.5% TIS,  $v_{\text{total}} = 500 \mu\text{L}$ ) for one hour. Subsequently, the crude product **5** was washed again with DMF and 10x DCM and then scraped off the frit using 100  $\mu\text{L}$  H<sub>2</sub>O, transferred to a 1.5 mL microcentrifuge tube and stored in the dark at 4°C. For fluorescence microscopy and spectroscopy applications, the product **11** in 100  $\mu\text{L}$  H<sub>2</sub>O was submitted to ultrasonication (5 min, 30% amp, 4°C) followed by separation of supernatant and pellet by centrifugation (16100g, 30 min). The supernatant was used for fluorescence microscopy and spectroscopy applications.

### 1.3.4 96-well synthesis of SWCNT\*-Peptides

Approx. 30 pmol SWCNT\*-Phe-Fmoc ( $c = 10 \text{ nM}$ ,  $V = 3 \text{ mL}$ ) were added to and filtered through individual wells of a 96-well plate equipped with 0.2  $\mu\text{m}$  pore size filters (Chromafil Multi 96 plate with PTFE filters, Macherey-Nagel, Germany). The samples were washed (with 5x H<sub>2</sub>O, 3x DMF, 3x DCM, 3x DMF) followed by standard Fmoc/OtBu SPPS (2x15min Fmoc deprotection [20% Piperidine/DMF], 30min amino acid coupling [13.5  $\mu\text{mol}$  amino acid/HATU, 27  $\mu\text{mol}$  DIPEA]) and final deprotection of side-chain protecting groups using the deprotection cocktail (375  $\mu\text{L}$  TFA, 100  $\mu\text{L}$  DCM, 12.5  $\mu\text{L}$  TIS, 12.5  $\mu\text{L}$  H<sub>2</sub>O, 60 min). All steps were carried out under mild agitation of the 96-well plate on a shaker (150 rpm). After final deprotection, the SWCNT samples were again washed (using 3xDCM, 3xDMF, 10xDCM) and then resuspended using 600  $\mu\text{L}$  H<sub>2</sub>O and transferred to 1.5 mL centrifuge tubes. Next, the samples were spun down (16100g, 30 min), resuspended in 200  $\mu\text{L}$  1% sodium deoxycholate (DOC) solution and submitted to tip-sonication (5 min, 4°C, 30% amplitude). After centrifugation, the top 80% of the supernatant were again transferred to fresh microcentrifuge tubes and used for absorbance/fluorescence spectroscopy applications.

## SUPPORTING INFORMATION

The following Fmoc-protected amino acids were used:

|                  |                  |                  |                   |
|------------------|------------------|------------------|-------------------|
| Fmoc-Asn(Trt)-OH | Fmoc-Gly-OH      | Fmoc-Tyr(tBu)-OH | Fmoc-Asp(OtBu)-OH |
| Fmoc-His(Trt)-OH | Fmoc-Gln(Trt)-OH | Fmoc-Ser(tBu)-OH | Fmoc-Glu(OtBu)-OH |
| Fmoc-Leu-OH      | Fmoc-Lys(Boc)-OH | Fmoc-Val-OH      | Fmoc-Phe-OH       |
| Fmoc-Ile-OH      | Fmoc-Ala-OH      | Fmoc-Thr(tBu)-OH |                   |

#### 1.4 *In vitro* GFP-binding assay

Based on a previously created silicon master, patterned PDMS stamps were created. Next, a 2  $\mu\text{M}$  GFP solution was added to the stamp, incubated for 10 minutes and the stamp subsequently rinsed with 1x PBS. In the next step, the PDMS stamp was transferred to a glass-bottom 96well-plate (previously coated with poly-L-lysine [ $0.1 \text{ mg mL}^{-1}$ , 10 min] and incubated for 30 minutes followed by washing (1xPBS, 0.3% TritonX100, 3x). In the next step, the GFP-modified surface was passivated using a 5% w/v BSA solution (15 min) and subsequently washed again (1xPBS, 0.3% TritonX100, 3x). Finally, the conjugate **5** and its corresponding controls were added to the wells and incubated for 30 minutes, followed again by washing (1xPBS, 0.3% TritonX100, 3x) and addition of 200  $\mu\text{L}$  of 1x PBS before imaging.

#### 1.5 VIS/NIR fluorescence microscopy of SWCNT\*-F-CF, SWCNT\*-F-R<sub>6</sub>-CF and the corresponding controls

Each 5  $\mu\text{L}$  of the respective solutions were immobilized on a glass-coverslip *via* spin-coating (RT, 1000 rpm). Mounted on a glass-cover-slide, CF/nIR imaging was carried out on an Olympus IX53 microscope with a 100x oil-immersion objective (Olympus 100x UPLSAPO 100XS, NA=1.35) using 561 nm excitation by a Cobolt Jive™ laser (Cobolt AB, Solna, Sweden, 200 mW). CF fluorophores were excited by a xCite 120Q lamp (Excelitas Technologies, USA) using the lowest intensity/iris step. Detection of the near-infrared photoluminescence was carried using a Xenics® Cheetah SWIR camera (Xenics, Heverlee, Belgium,  $t_{\text{int}} = 1 \text{ s}$ ), whereas CF fluorescence was observed by an Andor Zyla 5.5 sCMOS camera (Andor Technology Ltd., Belfast, Northern Ireland,  $t_{\text{int}} = 0.1 \text{ s}$ ). Image overlay was conducted using a custom Python script.

#### 1.6 VIS-fluorescence spectroscopy of SWCNT\*-F-CF

The samples were diluted 200-fold to a final volume of 1000  $\mu\text{L}$  and the fluorescence spectra recorded as described in section 1.1.

## SUPPORTING INFORMATION

## 2. Results and Discussion

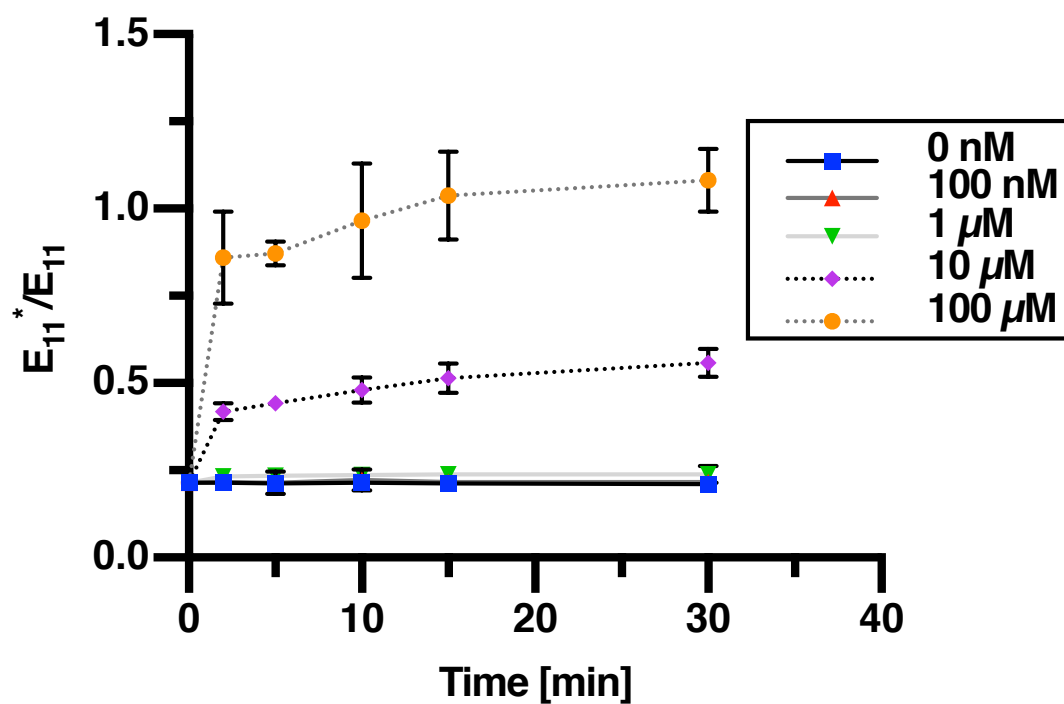

**Figure S1.** Evolution of the  $E_{11}^*$  emission peak over time when irradiated with a green 96-LED-array and different concentrations of MalPh diazonium salt **2** ( $n = 3$ , mean  $\pm$  SD). The defect introduction was carried out in triplicates for each MalPh-Dz concentration in a 96-well plate following the procedure described in section 1.3.1. At the indicated time points (2, 5, 10, 15, 30 minutes) 30  $\mu$ L aliquots were taken for NIR fluorescence measurement (see section 1.1).

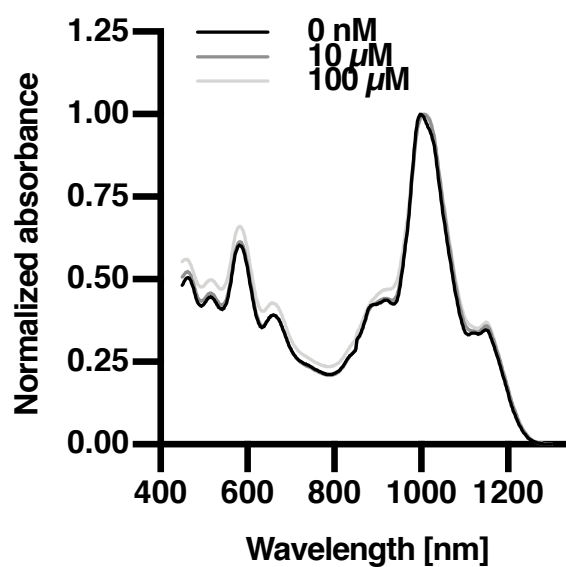

**Figure S2.** VIS/NIR absorbance spectroscopy of SDBS-dispersed SWCNTs before and after introduction of MalPh quantum defects [0, 10 and 100  $\mu$ M MalPh-Dz **2** concentration].



## SUPPORTING INFORMATION

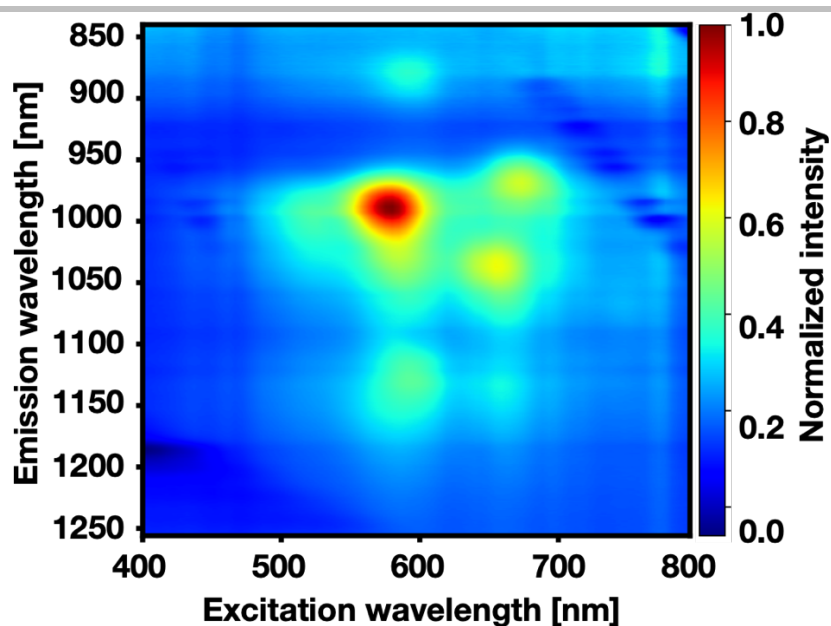

**Figure S3.** Excitation-emission map (2D spectrum) of SDBS-dispersed SWCNTs before introduction of MalPh quantum defects showing a major emission peak at approx. 1000 nm.

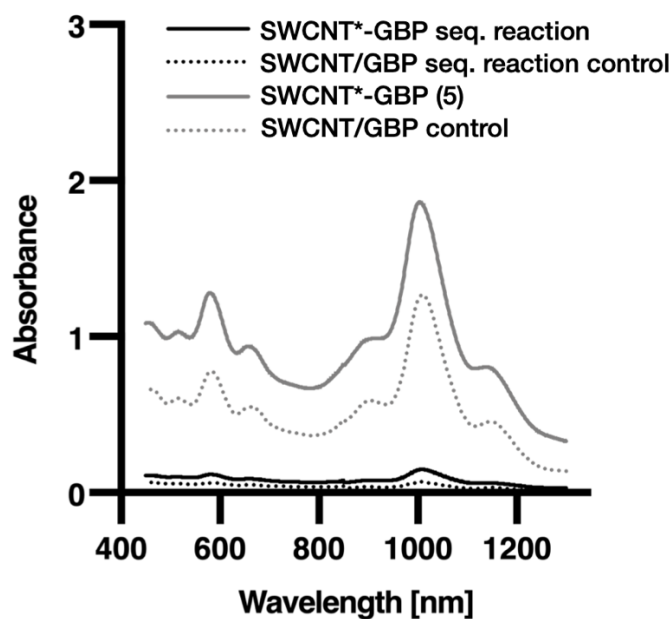

**Figure S4.** VIS/NIR absorbance spectroscopy of SWCNT\*-GBP and the SWCNT/GBP control (comparing the sequential and the one-pot reaction) after removal of excess GBP using spin-filtration and redispersion in PL-PEG5000 of both positive and negative control of the GBP conjugation to SWCNTs. In contrast to the one-pot reaction (grey lines), redispersion of the samples originating from the sequential reactions did not lead to well-dispersed samples. The samples were prepared according to the procedures described in section 1.3.2 (for both controls without the addition of the MalPh diazonium salt and consequently without  $sp^3$  defects).

## SUPPORTING INFORMATION

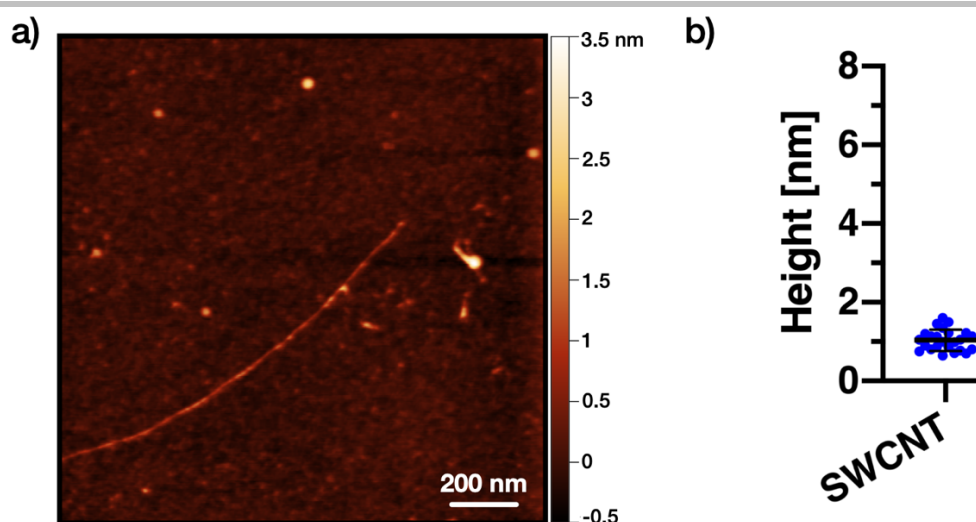

**Figure S5.** A) Representative atomic force microscopy image of a control SWCNT after following the same reaction steps as for conjugate **5** (one-step reaction, details see section 1.3.2.2) yet without the addition of MalPh-Dz **2** showing no conjugation of the nanobody. B) Measured heights of SWCNTs from the same control sample (mean  $\pm$  SD,  $n = 24$ ).

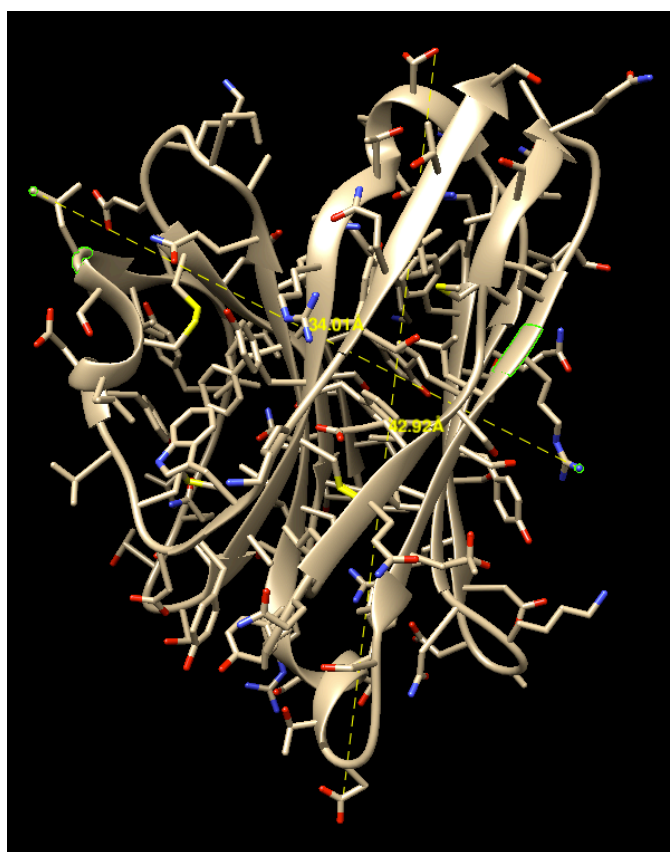

**Figure S6.** X-ray structure of a GFP-Minimizer nanobody (PDB: 3G9A) and distance measurements.

## SUPPORTING INFORMATION

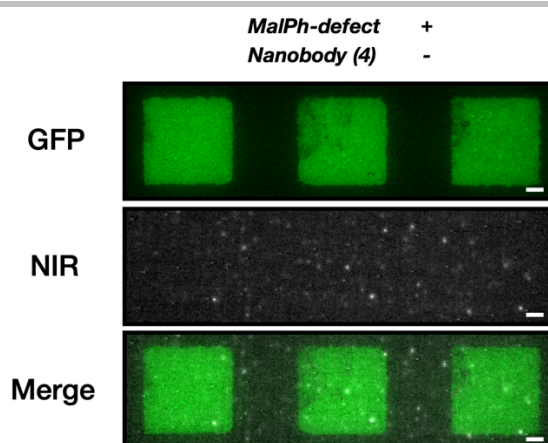

**Figure S7.** Control VIS/NIR fluorescence experiment with a microcontact-printed GFP-pattern incubated with MalPh-SWCNT\* following the same procedure as described in section 1.4. The absence of colocalization in this experiment shows the importance of the nanobody for GFP-binding and rules out binding as a result from possibly unoccupied and unhydrolyzed MalPh groups on the SWCNT surface, that could be captured by GFP's thiols. Scale bars = 5  $\mu\text{m}$ . The three columns are technical replicates.

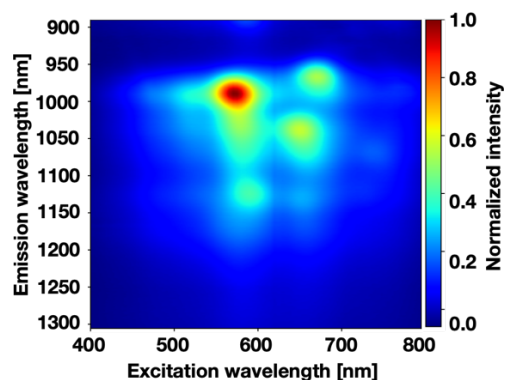

**Figure S8.** Excitation-emission map (2D spectrum) of a SWCNT/SDBS sample illuminated with green light for 15 minutes following the same procedure as for the synthesis of **7** (see section 1.3.3), but without the addition of Fmoc-Phe diazonium salt **6**.

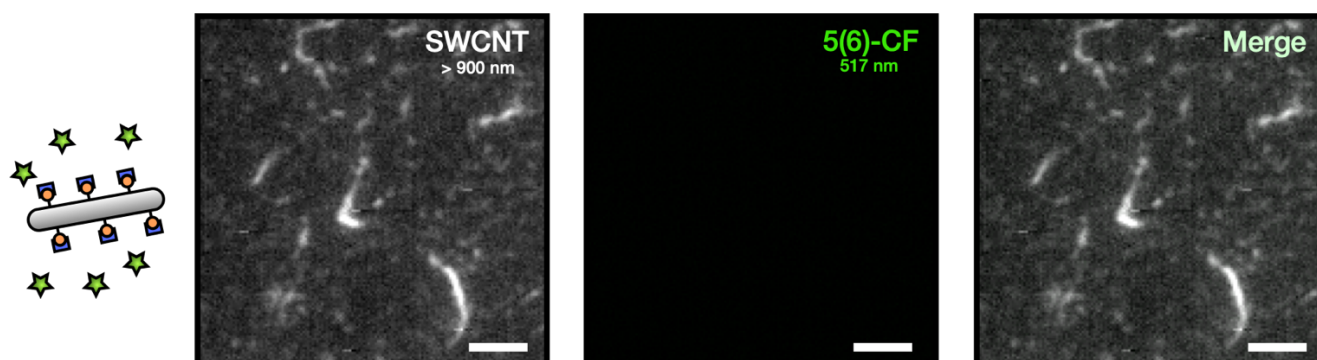

**Figure S9.** VIS/NIR fluorescence microscopy control experiment showing SWCNT\*-F-Fmoc, that were treated using the same procedure as for the synthesis of **10** (see section 1.3.4) including the 5(6)-carboxyfluorescein coupling reaction, but without the Fmoc deprotection using 20% piperidine/DMF. After washing (see 1.3.4), they were immobilized on a glass surface and imaged. While they still show NIR fluorescence, no 5(6)-CF fluorescence can be observed and consequently no colocalization. Scale bars = 5  $\mu\text{m}$ .

## SUPPORTING INFORMATION

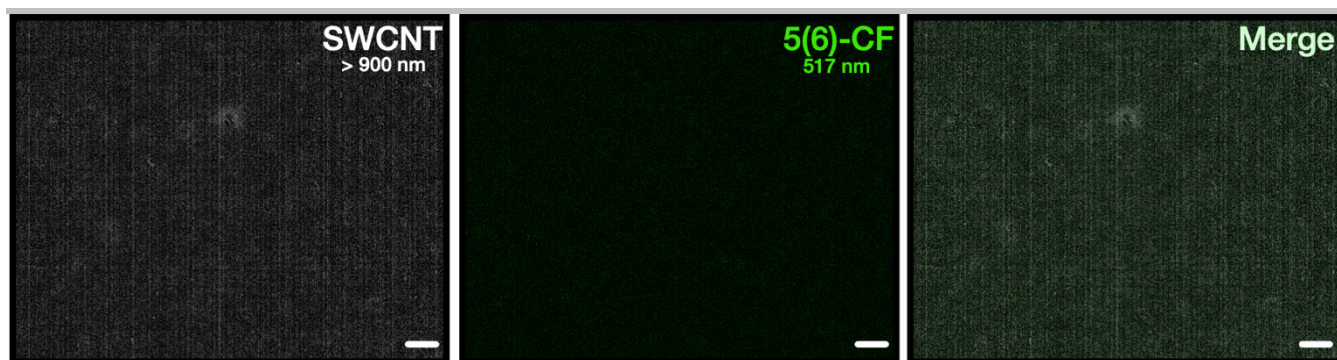

**Figure S10.** VIS/NIR fluorescence microscopy control experiment showing the SWCNT- $R_6$ -CF control (without the addition of diazonium salt **6** and thus without F-Fmoc defects) after centrifugation and spin-coating on a glass coverslip showing neither carbon nanotube NIR-fluorescence nor CF fluorescence (scale bars = 10  $\mu$ m).

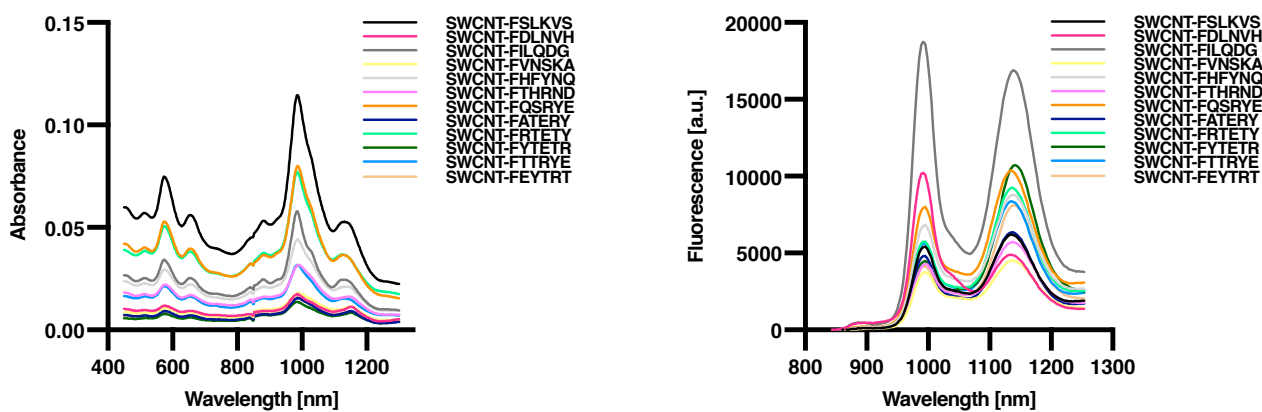

**Figure S11.** VIS/NIR absorbance and NIR fluorescence spectra of the SWCNT\*-Peptides after redispersion using sodium deoxycholate (DOC). The absorbance intensity and thus also the absolute SWCNT concentrations are subject to variation due to small deviations in the tip-sonication process required for redispersion. For fluorescence measurements, the solutions were brought to the same SWCNT concentrations based on their absorbance at approx. 1000 nm (see section 1.1 for concentration determination).

## SUPPORTING INFORMATION

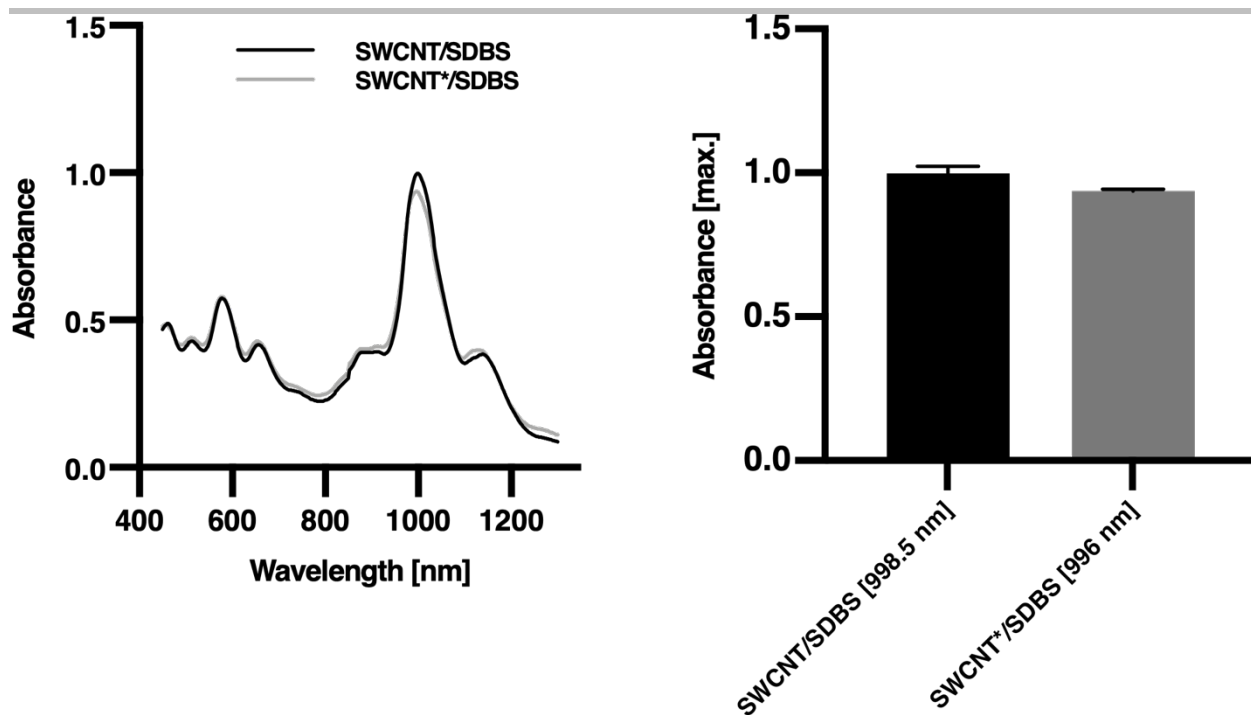

**Figure S11.** Absorbance spectra of a SWCNT/SDBS sample treated using green light for 15 minutes with (grey) and without the addition of diazonium salt **6** (black) measured in the supernatant after centrifugation (30 min, 16100g). Mean  $\pm$  SD ( $N = 3$ ).

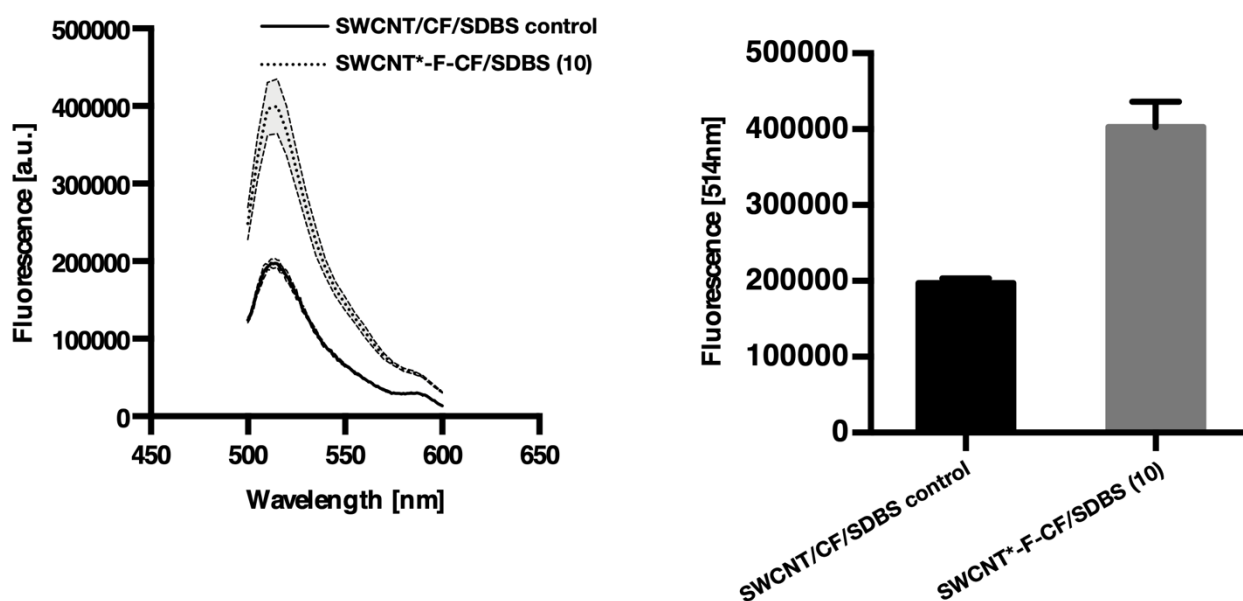

**Figure S12.** Fluorescence spectroscopy of positive and negative control samples for the conjugation of 5(6)-CF to SWCNT\*-F-NH<sub>2</sub>. The control was generated following the same procedure as for the synthesis of **10** (see section 1.3.4), yet without prior F-Fmoc defect introduction. Despite some degree of background fluorescence also in the control sample, which might arise from non-covalent adsorption to the hydrophobic SWCNT surface, the positive sample having the F-defect shows a significantly higher CF-fluorescence. Mean  $\pm$  SD ( $N = 3$ ).

## SUPPORTING INFORMATION

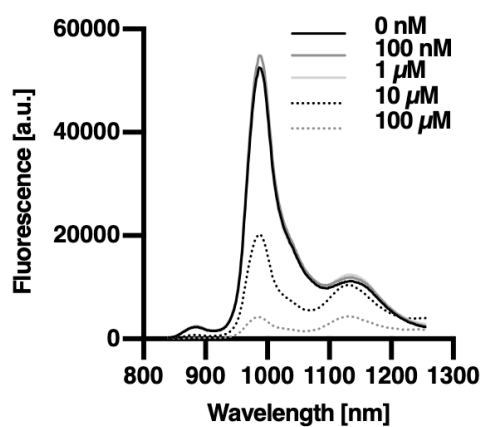

**Figure S13.** Absolute NIR fluorescence spectra of SWCNTs before and after introduction of MalPh defects with different concentrations of MalPh-Dz (15 minutes illumination time) showing the decrease of the  $E_{11}$  with increasing MalPh-Dz concentration.

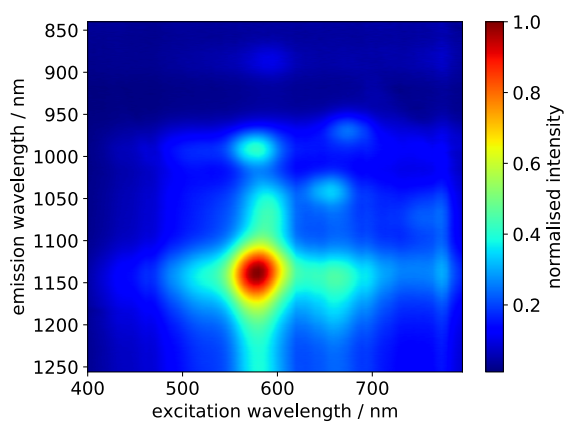

**Figure S14.** Excitation-emission map (2D spectrum) of a MalPh-SWCNT\* sample after spin-filtration and redispersion using PL-PEG5000 following the process described in section 1.3.1.

### 3. References

- [1] F. Schöppler, C. Mann, T.-C. Hain, F.-M. Neubauer, G. Privitera, F. Bonaccorso, D. Chu, A.-C. Ferrari, T. Hertel, *J. Phys. Chem. C* **2011**, 115, 14682-14686.
- [2] K. Zhang, X.-H. Xu, F.L. Qing, *Eur. J. Org. Chem.* **2016**, 30, 5088–5090.
- [3] J.-C. Harper, R. Polsky, D.-R. Wheeler, S.-M. Brozik, *Langmuir* **2008**, 24, 2206-2211.

### 4. Author Contributions

S.K. and F.A.M. designed and conceived the project. N.H. performed synthesis of the MalPh diazonium salt, NMR/MS analysis, initial experiments and optimized the conditions for MalPh-defect incorporation. F.A.M. performed AFM experiments, synthesized the Fmoc-Phe diazonium salt with N.H., optimized the conditions for Fmoc-Phe defect incorporation, performed the nanobody conjugation and validation experiments, synthesized multi-color SWCNTs, SWCNT-R<sub>6</sub> and performed the 96-well SWCNT-Peptide synthesis as well as the subsequent characterization. F.O. provided the GFP-binding nanobody. F.A.M., N.H. and S.K wrote the manuscript with input from F.O.

## SUPPORTING INFORMATION

## 5. NMR spectra of diazonium salts 2 and 6

5.1. 4-(*N*-maleimido)phenyldiazonium tetrafluoroborate (2)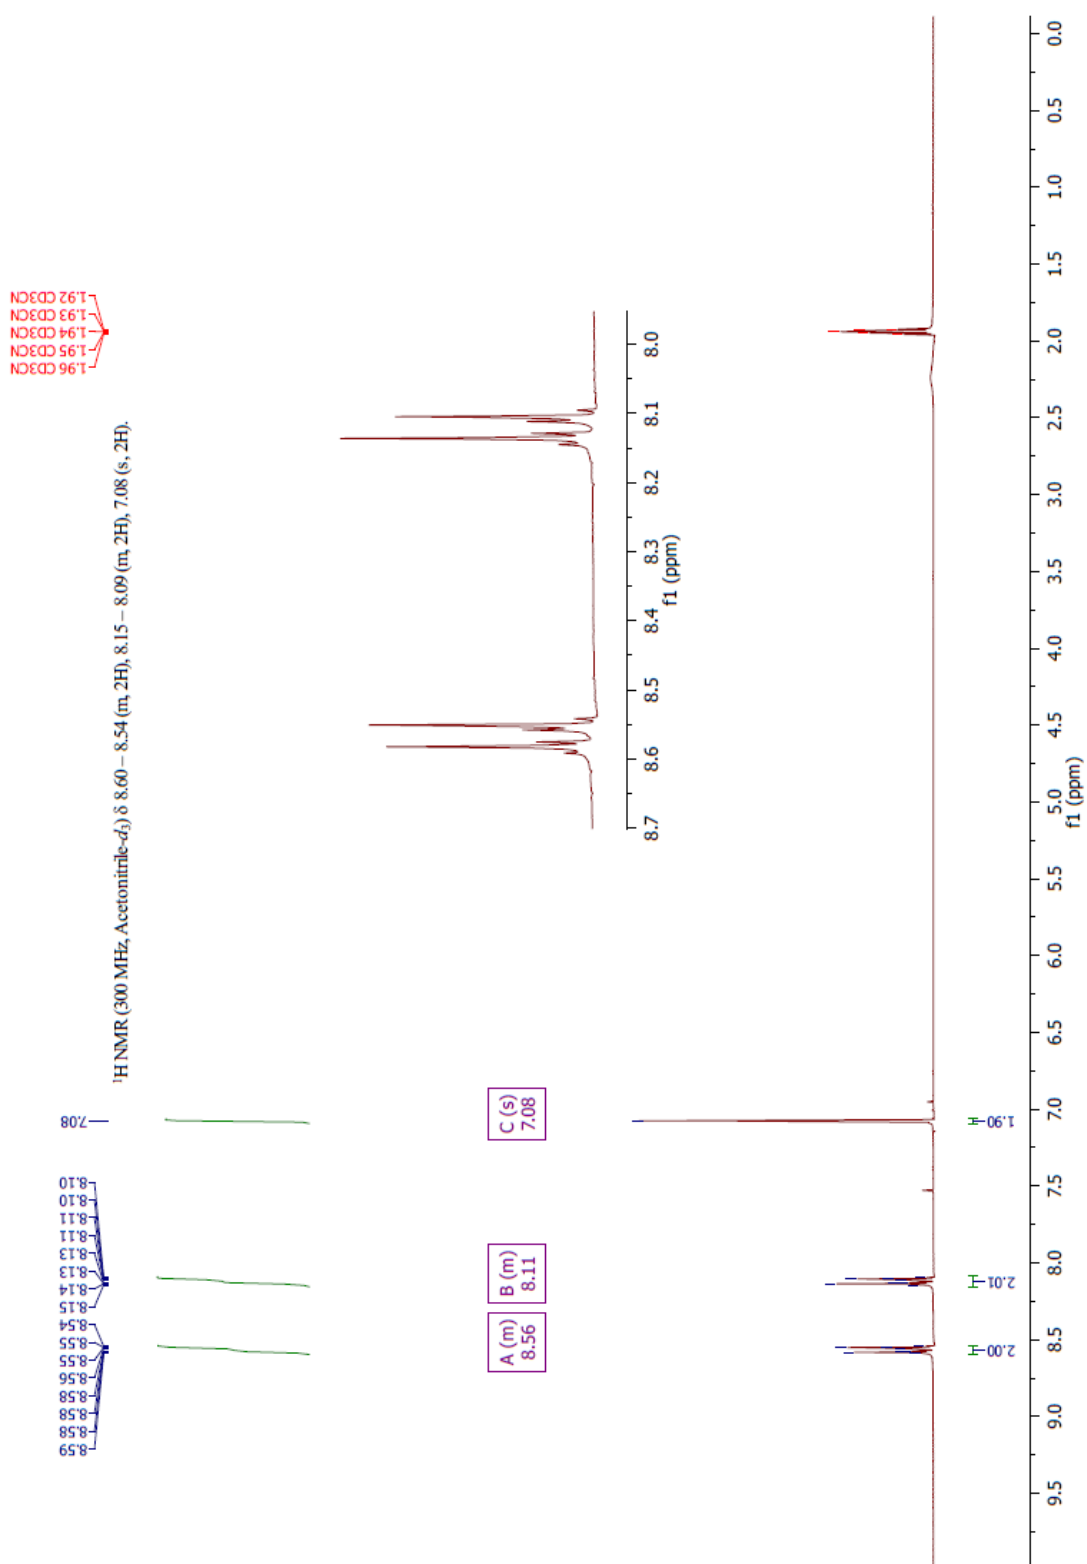



## SUPPORTING INFORMATION

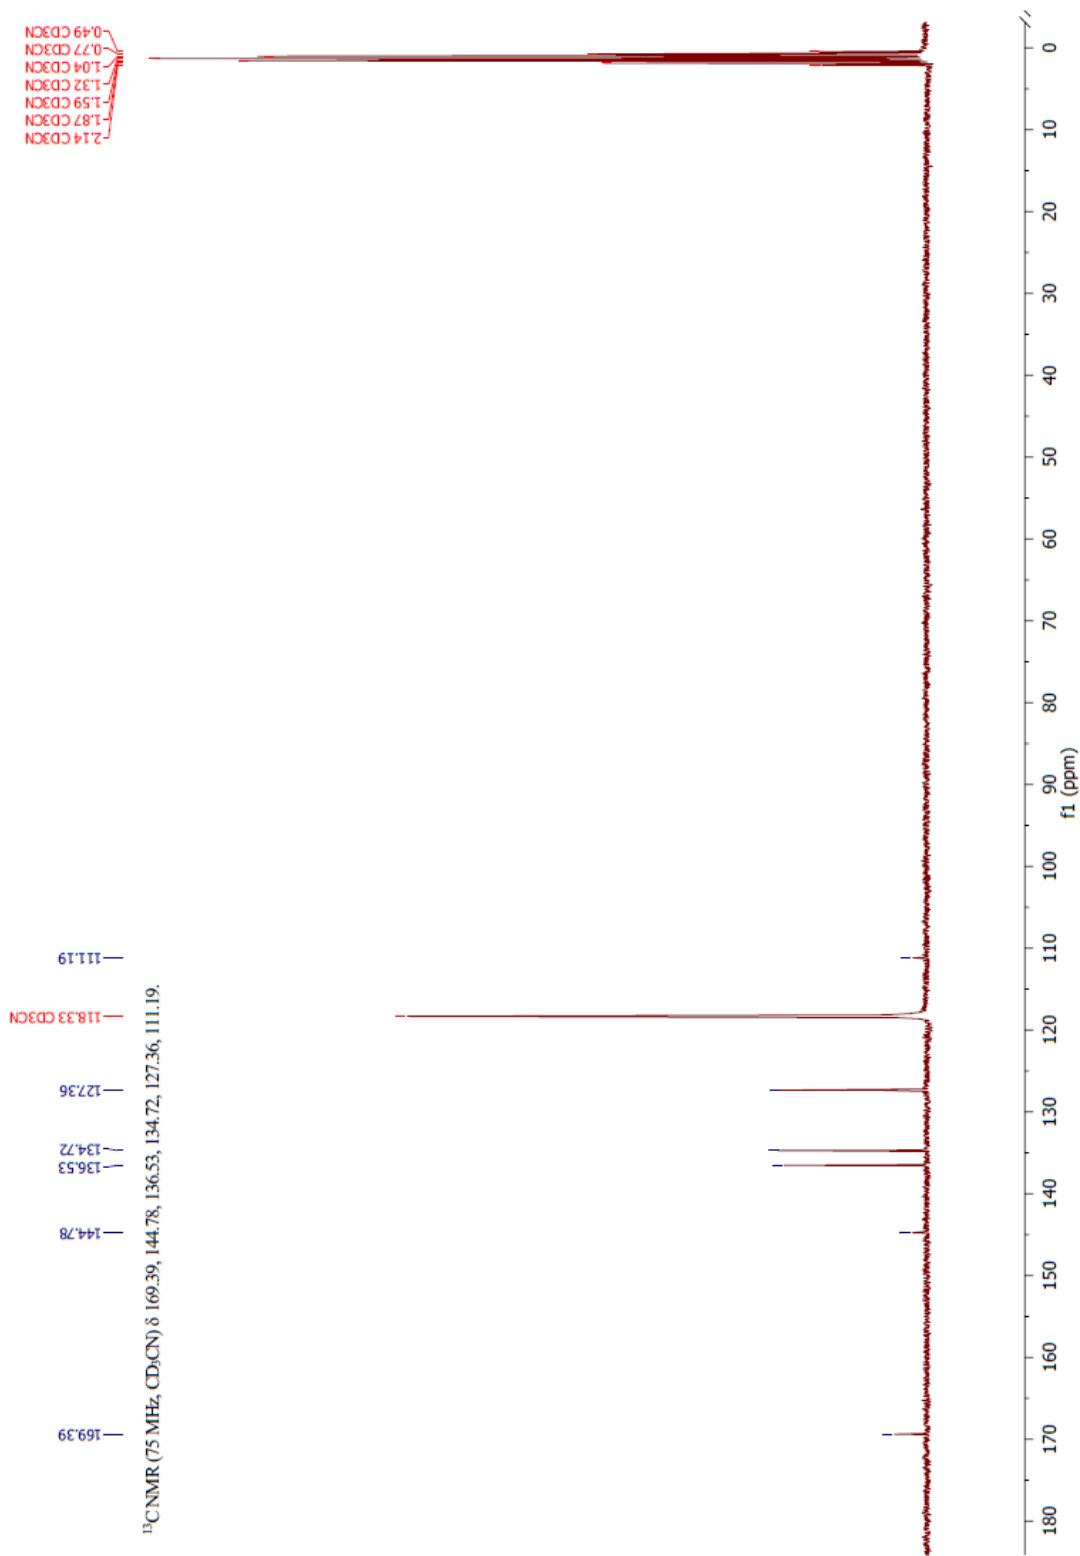

## SUPPORTING INFORMATION

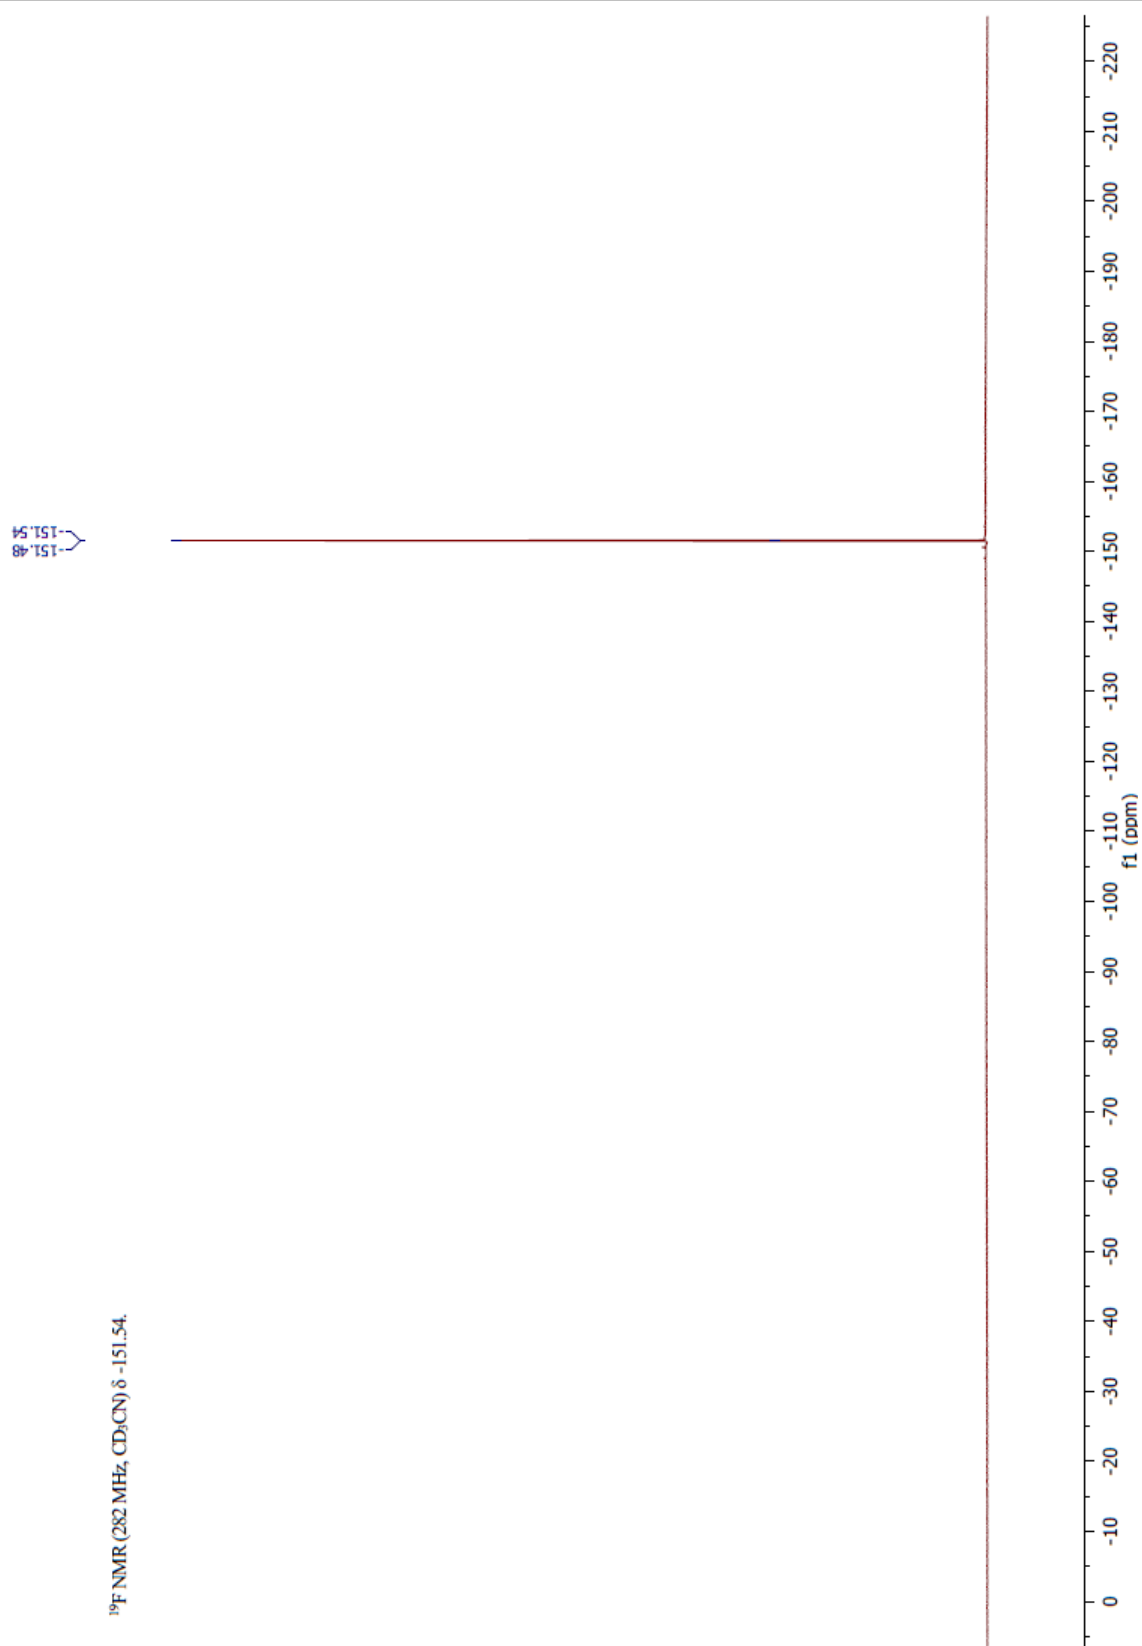

## SUPPORTING INFORMATION

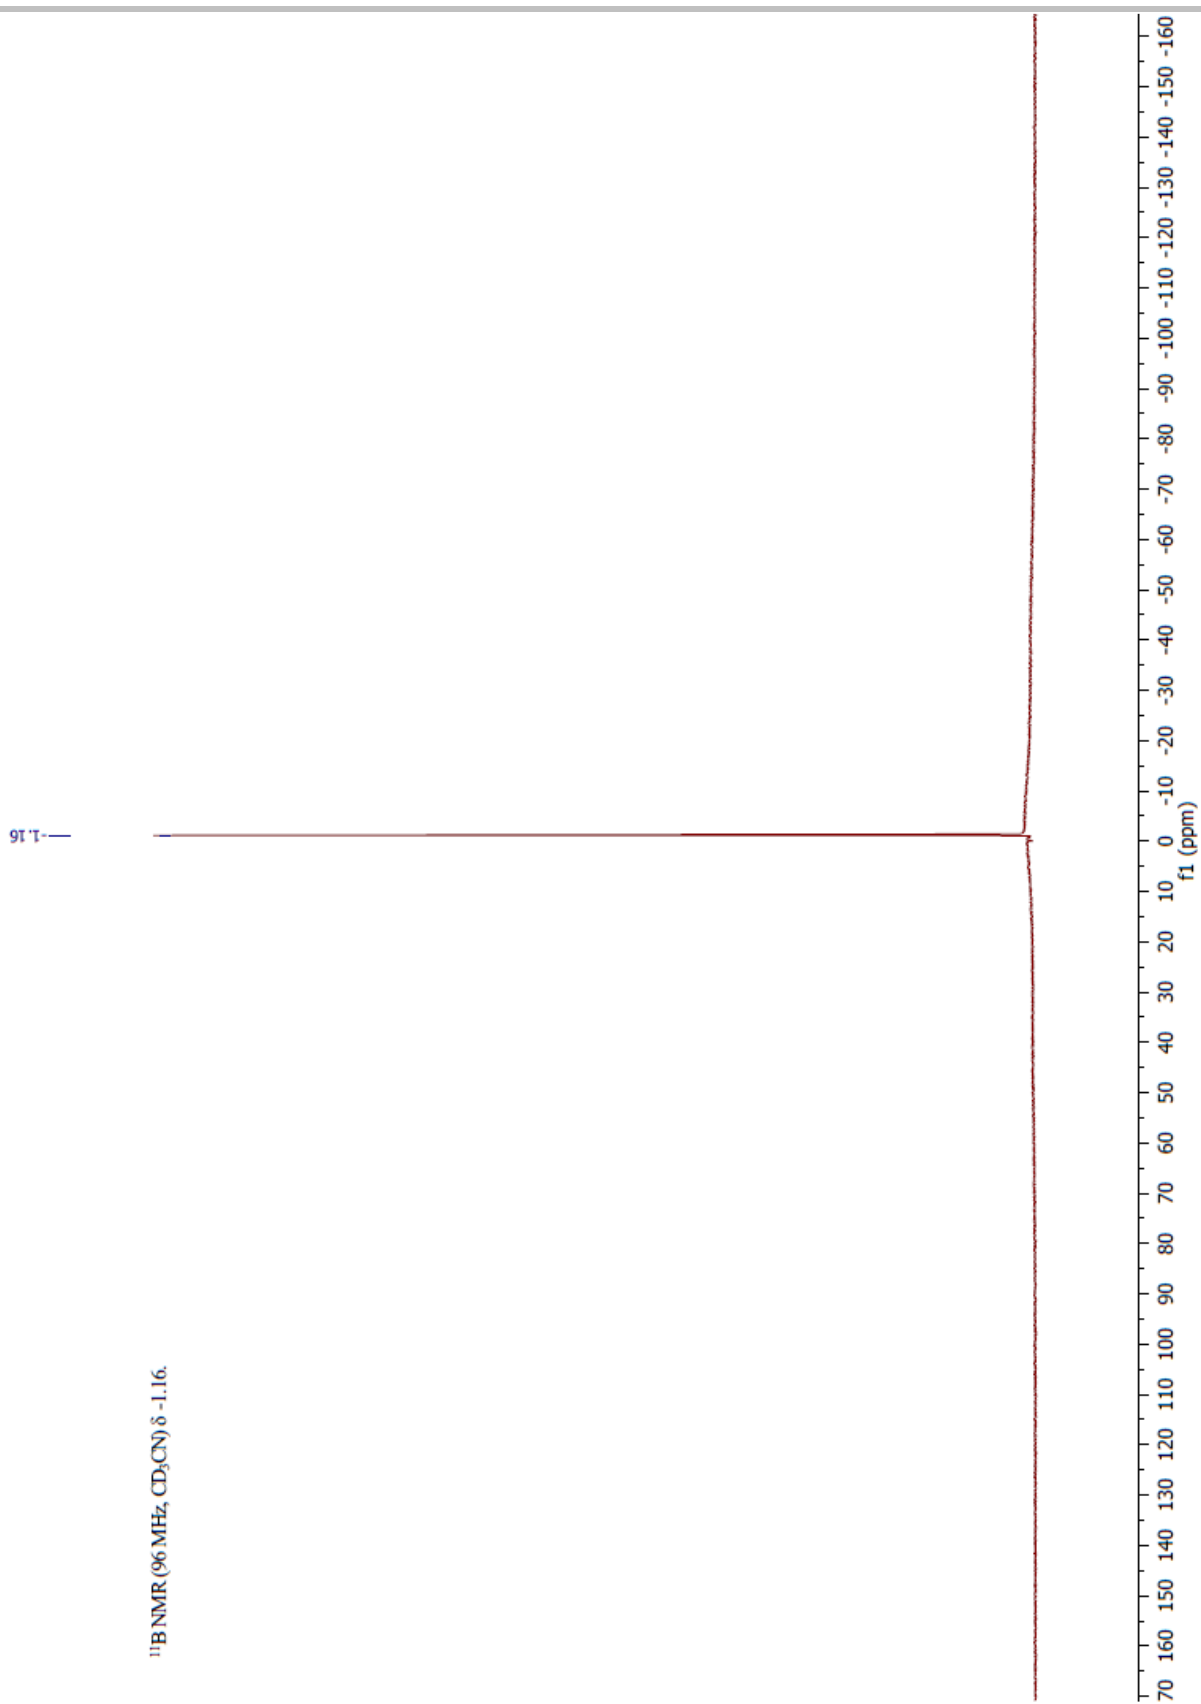

## SUPPORTING INFORMATION

## 5.2. Fmoc-L-4-diazonium-phenylalanine tetrafluoroborate (6)

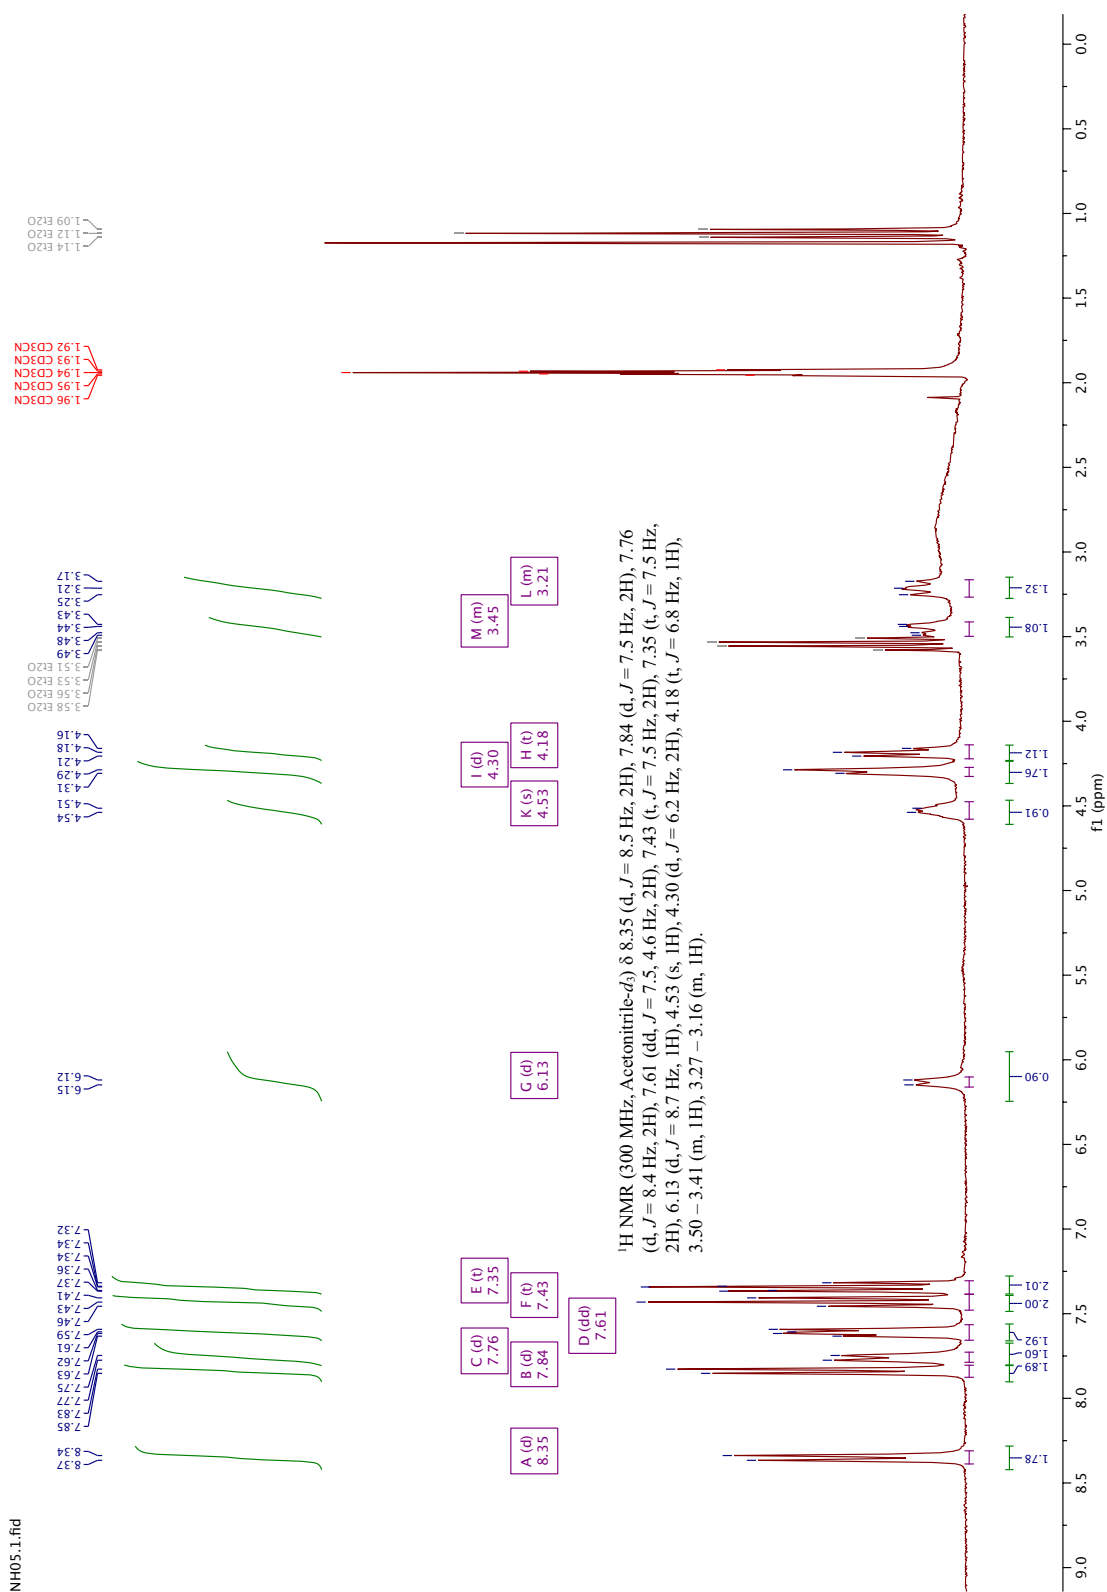

## SUPPORTING INFORMATION

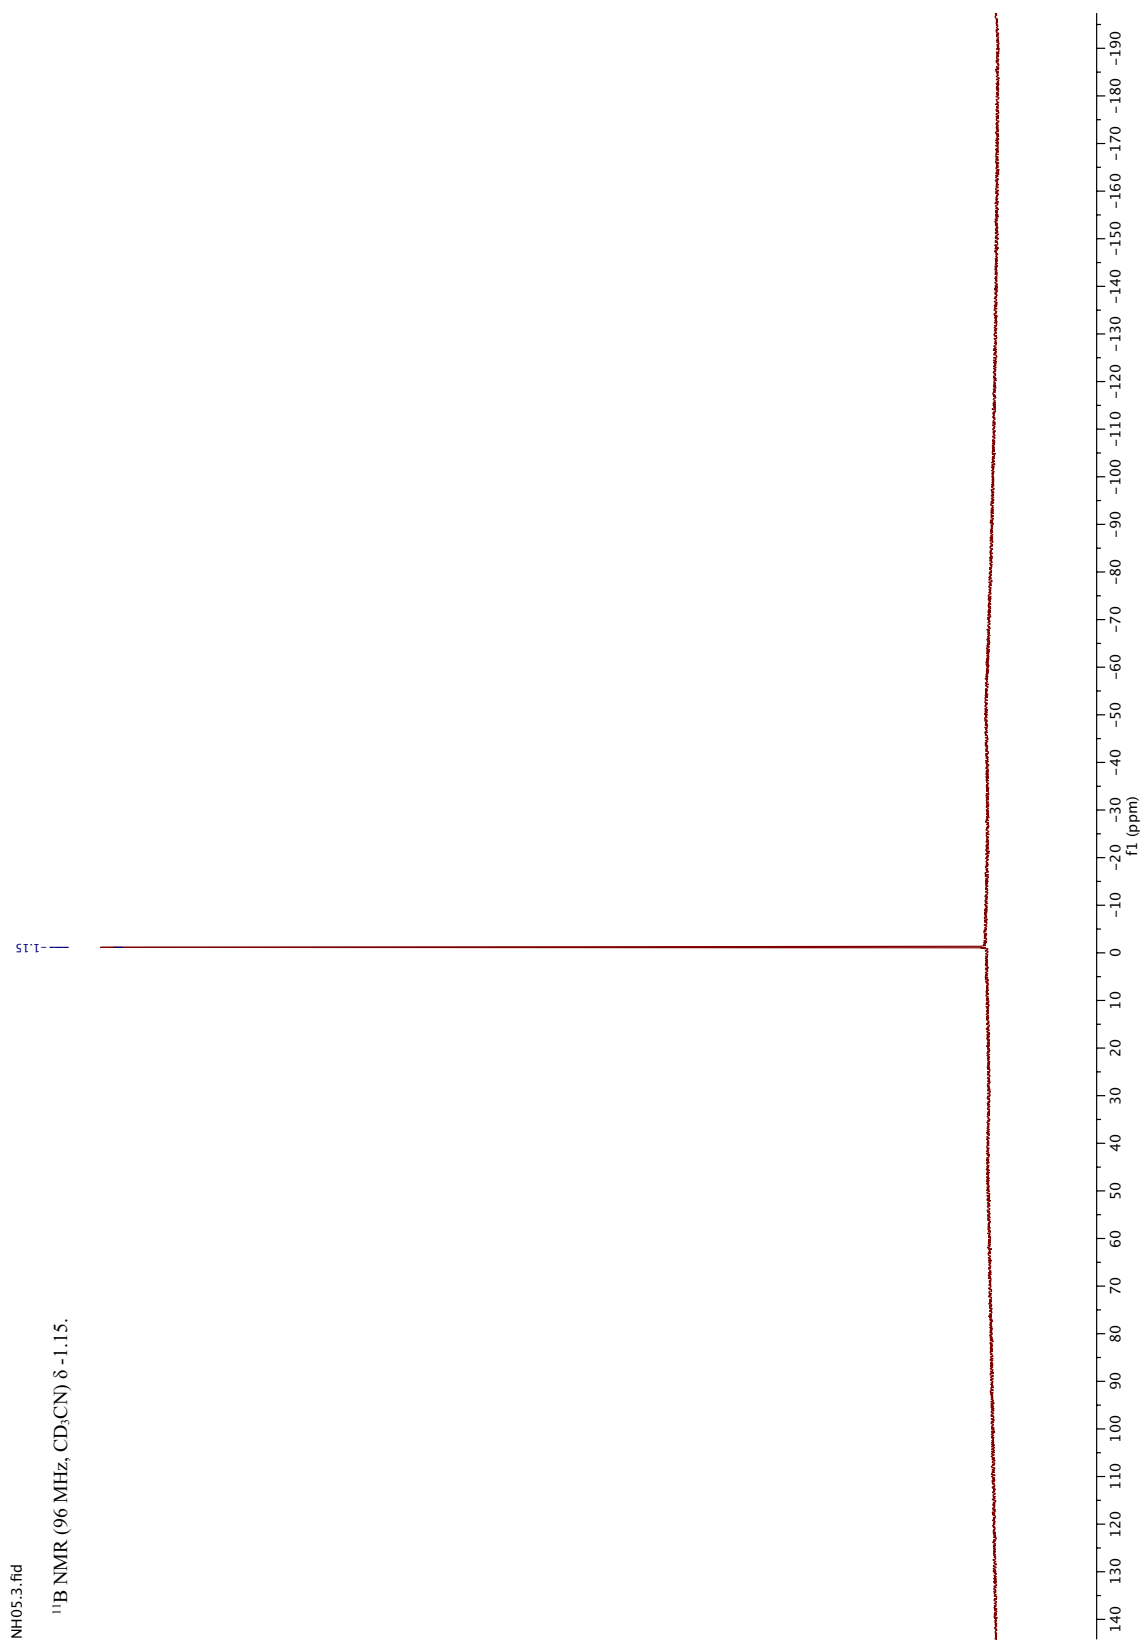

## SUPPORTING INFORMATION

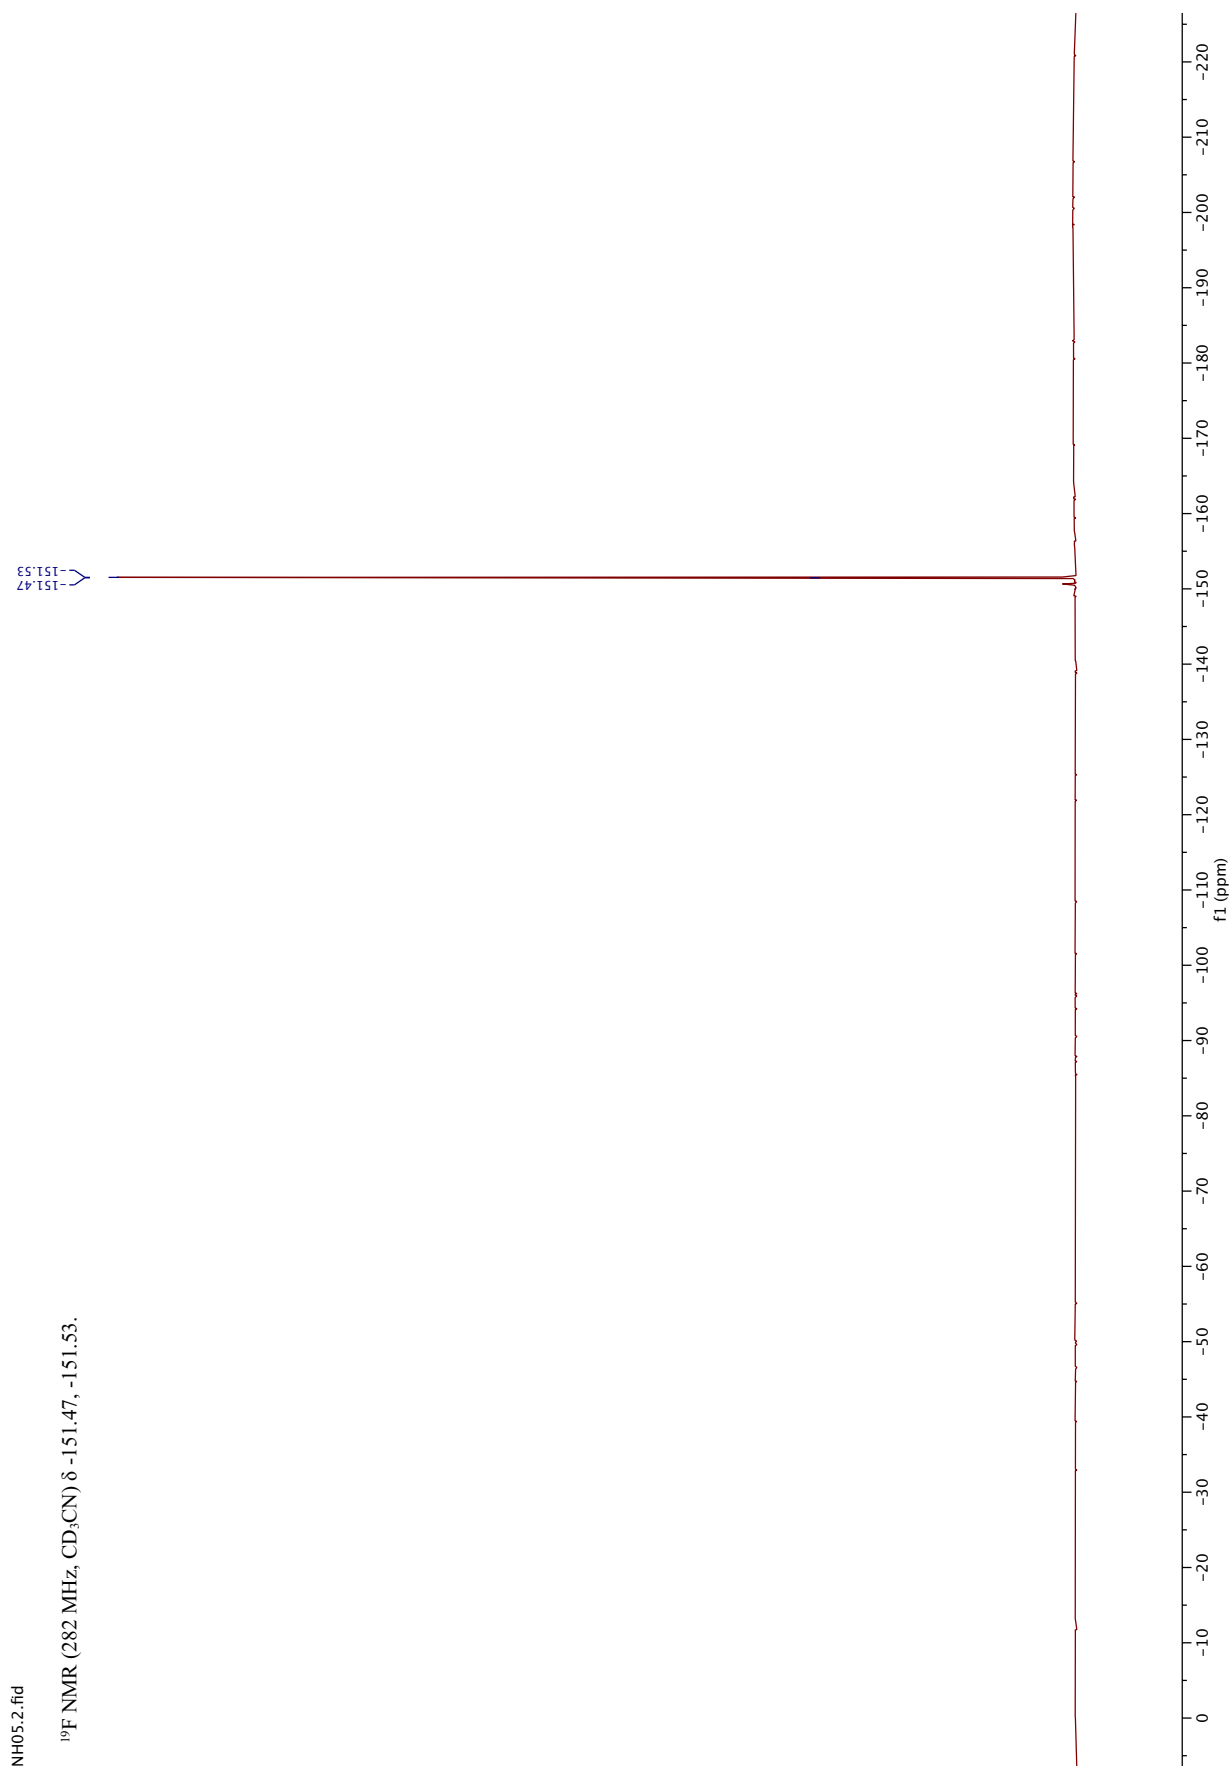

Supplement: ANIE-59-17732-s001.pdf [file ANIE-59-17732-s001.pdf]
